# Supplementary material for: Assessment of Methods for Rapid Intraoperative Concentration and Selection of Marrow-Derived Connective Tissue Progenitors for Bone Regeneration Using the Canine Femoral Multidefect Model
Source: PubMed Central journal article supplement — Tissue Eng Part A. 2016 Jan 4;22(1-2):17–30. doi: 10.1089/ten.tea.2014.0663 (PMC5028130; doi:10.1089/ten.tea.2014.0663), 2016-01-04
Supplement: Supp_Table1.pdf [file Supp_Table1.pdf]

## Supplementary Data

SUPPLEMENTARY TABLE S1. SUMMARY OF MEAN TISSUE AREA PERCENTAGE BY COHORT AND REGIONS

| Cohort        | Region  | Group | New lamellar bone, % |     | New woven bone, % |     | Residual allograft, % |      | Fibrous marrow, % |     | Sinus, % |      | Hematopoietic marrow, % |      | Void, % |     |      |      |     |                   |      |     |      |
|---------------|---------|-------|----------------------|-----|-------------------|-----|-----------------------|------|-------------------|-----|----------|------|-------------------------|------|---------|-----|------|------|-----|-------------------|------|-----|------|
|               |         |       | SE                   | p   | SE                | p   | SE                    | p    | SE                | p   | SE       | p    | SE                      | p    | SE      | p   |      |      |     |                   |      |     |      |
| Cohort I      | Overall | BMA   | 20.6                 | 2.2 | 0.83              | 2.8 | 0.6                   | 0.46 | 6                 | 1.0 | 0.88     | 18.5 | 3.3                     | 0.74 | 6.6     | 1.6 | 0.59 | 30.8 | 3.1 | 0.48              | 14.6 | 1.6 | 0.54 |
|               |         | DS    | 19.9                 | 2.2 | 0.57              | 2.2 | 0.6                   | 0.1  | 5.8               | 1.0 | 0.8      | 17   | 3.3                     | 0.9  | 7.9     | 1.6 | 0.77 | 34   | 3.1 | 0.35              | 13.3 | 1.6 | 0.4  |
|               | IM      | BMA   | 20.2                 | 2.4 | 0.85              | 2.9 | 0.6                   | 0.1  | 5.1               | 1.2 | 0.8      | 12.9 | 4                       | 0.9  | 7.4     | 1.8 | 0.77 | 35.6 | 3.6 | 0.35              | 15.8 | 1.8 | 0.4  |
|               |         | DS    | 18.3                 | 2.4 | 0.85              | 1.5 | 0.6                   | 0.77 | 5.6               | 1.2 | 0.6      | 12.5 | 4                       | 0.6  | 8.1     | 1.8 | 0.46 | 40.4 | 3.6 | 0.76              | 13.7 | 1.8 | 0.8  |
|               | PC      | BMA   | 20.9                 | 2.4 | 0.85              | 2.7 | 0.6                   | 0.77 | 6.9               | 1.2 | 0.6      | 24.2 | 4                       | 0.6  | 5.9     | 1.8 | 0.46 | 25.9 | 3.6 | 0.76              | 13.3 | 1.8 | 0.8  |
|               |         | DS    | 21.6                 | 2.4 | 0.85              | 3   | 0.6                   | 0.77 | 6                 | 1.2 | 0.6      | 21.4 | 4                       | 0.6  | 7.7     | 1.8 | 0.46 | 27.5 | 3.6 | 0.76              | 12.8 | 1.8 | 0.8  |
| Cohort II     | Overall | DS-T  | 16.2                 | 1.7 | 0.88              | 3.2 | 0.4                   | 0.21 | 5.8               | 0.8 | 0.34     | 21.8 | 5.1                     | 0.14 | 8.2     | 1.5 | 0.48 | 28.1 | 4.3 | 0.08              | 16.6 | 1.2 | 0.65 |
|               |         | SR    | 15.6                 | 1.7 | 0.88              | 2.5 | 0.4                   | 0.21 | 4.7               | 0.8 | 0.34     | 10.9 | 5.1                     | 0.14 | 9.7     | 1.5 | 0.48 | 39.5 | 4.3 | 0.08              | 17.3 | 1.2 | 0.65 |
|               | IM      | DS-T  | 16.4                 | 1.9 | 0.24              | 3.1 | 0.5                   | 0.26 | 6.1               | 1   | 0.28     | 18.5 | 5.8                     | 0.21 | 9.5     | 1.7 | 0.34 | 26.4 | 4.7 | 0.04 <sup>a</sup> | 15.8 | 1.8 | 0.4  |
|               |         | SR    | 13.2                 | 1.9 | 0.35              | 2.3 | 0.5                   | 0.39 | 4.5               | 1   | 0.72     | 8.1  | 5.8                     | 0.21 | 11.9    | 1.7 | 0.78 | 40.6 | 4.7 | 0.2               | 13.7 | 1.8 | 0.8  |
|               | PC      | DS-T  | 15.7                 | 1.9 | 0.35              | 3.3 | 0.5                   | 0.39 | 5.4               | 1   | 0.72     | 25.6 | 5.8                     | 0.13 | 6.9     | 1.7 | 0.78 | 29.8 | 4.7 | 0.2               | 13.3 | 1.8 | 0.8  |
|               |         | SR    | 18.2                 | 1.9 | 0.35              | 2.7 | 0.5                   | 0.39 | 4.9               | 1   | 0.72     | 13   | 5.8                     | 0.13 | 7.6     | 1.7 | 0.78 | 38.5 | 4.7 | 0.2               | 12.8 | 1.8 | 0.8  |
| DS group only | Overall | DS    | 19.9                 | 1.9 | 0.18              | 2.2 | 0.4                   | 0.12 | 5.8               | 2.3 | 0.98     | 17   | 4.6                     | 0.46 | 7.9     | 1.7 | 0.9  | 29.8 | 4.7 | 0.2               | 13.2 | 1.2 | 0.07 |
|               | Defect  | DS-T  | 16.1                 | 2   | 0.18              | 3.2 | 0.4                   | 0.12 | 5.7               | 2.5 | 0.98     | 22.1 | 5                       | 0.46 | 8.2     | 1.9 | 0.9  | 38.5 | 4.7 | 0.2               | 16.6 | 1.3 | 0.07 |

<sup>a</sup>Statistically significant at  $p < 0.05$  (ANOVA).

BMA, bone marrow aspirate; IM, intramedullary; DS, density separation; PC, pericortical; SE, standard error; SR, selective retention.
